# Supplementary material for: Reversible redox modifications in the microglial proteome challenged by beta amyloid
Source: Royal Society of Chemistry journal article supplement (doi:10.1039/c4mb00703d), 2015-03-02
Supplement: c4mb00703d3.pdf [file c4mb00703d3.pdf]

**Table S2**

**Summary of reversible redox modified cysteinyl sites changing in microglia proteins upon treatment with A $\beta$ <sub>25-35</sub> peptide.**

| Proteins <sup>a</sup> | Protein names                                            | RRM containing peptide sequence <sup>b</sup> | PEP <sup>c</sup> | Score <sup>d</sup> | Redox sensitive site <sup>e</sup> |         |           | RRM annotation <sup>f</sup>                    |
|-----------------------|----------------------------------------------------------|----------------------------------------------|------------------|--------------------|-----------------------------------|---------|-----------|------------------------------------------------|
|                       |                                                          |                                              |                  |                    | Cys#                              | resting | activated |                                                |
| Q9QZB7                | Actin-related protein 1                                  | SVATLILDSLQCPIDTR                            | 7.85E-007        | 157.8              | 291                               | +       |           |                                                |
| P50247                | Adenosylhomocysteinase                                   | VIITEIDPINALQAAMEGYEVTMDEACK                 | 6.50E-014        | 181.24             | 266                               | +       |           |                                                |
| P47738                | Aldehyde dehydrogenase                                   | LLCGGGAAADR                                  | 1.37E-048        | 145.55             | 388                               |         | +         |                                                |
| Q9D0I9                | Arginine-tRNA ligase, cytoplasmic                        | LQEVFGCAIR                                   | 4.82E-003        | 97.456             | 86                                |         | +         | SSG <sup>43</sup>                              |
| Q922B2                | Aspartate-tRNA ligase, cytoplasmic                       | VFCIGPVFR                                    | 9.16E-006        | 143.85             | 267                               |         | +         |                                                |
| Q9DCX2                | ATP synthase subunit d                                   | SCAEFVSGSQLR                                 | 5.01E-032        | 259.47             | 101                               |         | +         |                                                |
| Q80WV3                | Carbohydrate sulfotransferase 2                          | KEGMGGPADYHALGAMEVICNSMAK                    | 4.09E-002        | 38.175             | 399                               | +       |           |                                                |
| O70370                | Cathepsin S                                              | LISLSAQNLDVDCSNEEK                           | 9.52E-122        | 414.82             | 178                               |         | +         | SSG <sup>43</sup>                              |
| Q9WUU7                | Cathepsin Z                                              | HGIPDETCNNYQAK                               | 2.18E-015        | 221.86             | 156                               |         | +         | SSG <sup>43</sup>                              |
| Q9Z1Q5                | Chloride intracellular channel protein 1                 | LHIVQVVK                                     | 6.28E-006        | 149.65             | 191                               |         | +         | SNO <sup>62, 65</sup>                          |
| P18760                | Cofilin-1                                                | HELQANCYEEVKDR                               | 2.01E-067        | 328.14             | 139                               |         | +         | SSG <sup>43</sup><br>SNO <sup>62, 65, 66</sup> |
| O08749                | Dihydrolipoyl dehydrogenase                              | VCHAHPTLSEAFR                                | 1.82E-003        | 108.72             | 484                               |         | +         |                                                |
| Q9Z0J0                | Epididymal secretory protein E1                          | SGINCPIQK                                    | 2.75E-002        | 57.96              | 99                                |         | +         |                                                |
| P51906                | Excitatory amino acid transporter 3                      | NMFPENLVQACFQQYK                             | 3.87E-002        | 36.993             | 158                               | +       |           |                                                |
| P06745                | Glucose-6-phosphate isomerase                            | MIPCDFLIPVQTQHPIR                            | 3.98E-002        | 40.242             | 404                               |         | +         | SSG <sup>43</sup>                              |
| P68040                | Guanine nucleotide-binding protein subunit beta-2-like 1 | AEPPQCTSLAWSADGQTLFAGYTDNLVR                 | 3.11E-003        | 76.152             | 286                               | +       |           | SSG <sup>43</sup>                              |
|                       |                                                          | LWNTLGVK                                     | 2.56E-004        | 117.89             | 138                               |         | +         | SSG <sup>43</sup>                              |
| Q8BG05                | Heterogeneous nuclear ribonucleoprotein A3               | WGTLTDCVVMR                                  | 7.20E-003        | 97.734             | 64                                |         | +         | SNO <sup>51</sup>                              |
| Q9Z2X1                | Heterogeneous nuclear ribonucleoprotein F                | YGDSEFTVQSTTGHCVHMR                          | 1.05E-005        | 138.05             | 290                               |         | +         |                                                |
| O35737                | Heterogeneous nuclear ribonucleoprotein H                | GLPWSCSADEVQR                                | 9.79E-005        | 142.38             | 22                                |         | +         |                                                |
| P61979                | Heterogeneous nuclear ribonucleoprotein K                | IIPTLEGLQLPSPTATSQLPLESDAVECLNYQHYK          | 2.03E-012        | 141.43             | 132                               | +       |           | SSG <sup>43</sup>                              |
|                       |                                                          | LFQECCPHSTDR                                 | 4.53E-003        | 99.283             | 185 <sup>g</sup>                  |         | +         | SNO <sup>51</sup>                              |
| Q8R081                | Heterogeneous nuclear ribonucleoprotein L                | VFNVFLYGNVEK                                 | 2.03E-031        | 267.67             | 401                               | +       |           | SNO <sup>51</sup>                              |
|                       |                                                          | LCFSTAQHAS                                   | 1.42E-011        | 205.18             | 578                               |         | +         | SSG <sup>43</sup>                              |

|        |                                                   |                                    |           |        |                                  |   |   |                                                    |
|--------|---------------------------------------------------|------------------------------------|-----------|--------|----------------------------------|---|---|----------------------------------------------------|
| P21956 | Lactadherin                                       | ITLRLELLGC                         | 3.73E-010 | 130.98 | 463                              | + |   | SS with 308 <sup>67</sup>                          |
| Q3V3R1 | Monofunctional C1-tetrahydrofolate synthase       | EAGLDITHICLPPDSGEDEIIDEILK         | 4.04E-002 | 38.237 | 129                              | + |   | SSG <sup>43</sup>                                  |
| Q922Q1 | MOSC domain-containing protein 2                  | CVLTTVDPDTGHDR                     | 3.98E-002 | 43.813 | 274                              | + |   |                                                    |
| Q7TPV4 | Myb-binding protein 1A                            | SVFGHICPHLTPR                      | 9.99E-004 | 124.21 | 676                              |   | + | SNO <sup>51</sup>                                  |
| O08709 | Peroxiredoxin-6                                   | DFTPVCTTELGR                       | 1.79E-031 | 169.65 | 47                               |   | + | SSG <sup>43, 44</sup><br>SNO <sup>65, 66, 68</sup> |
| Q9WUA3 | 6-phosphofructokinase                             | LGITNLCVIGGDGSLTGANLFR             | 2.83E-027 | 240.71 | 122                              | + |   |                                                    |
| Q9DCD0 | 6-phosphogluconate dehydrogenase, decarboxylating | SAVDNCQDSWR                        | 5.00E-024 | 250.7  | 402                              |   | + |                                                    |
| Q9DBJ1 | Phosphoglycerate mutase 1                         | YADLTEDQLPSCESLK                   | 1.05E-043 | 300.03 | 153                              |   | + | SSG <sup>43</sup><br>SNO <sup>65, 66</sup>         |
| Q61233 | Plastin-2                                         | KLENCNYAVDLGK                      | 1.71E-022 | 237.32 | 460                              |   | + | SSG <sup>43</sup>                                  |
| P62962 | Profilin-1                                        | CYEMASHLR                          | 2.90E-008 | 166.09 | 128                              |   | + |                                                    |
| P17918 | Proliferating cell nuclear antigen                | DLSHIGDAVVISCAK                    | 1.54E-022 | 244.44 | 162                              |   | + | SSG <sup>43</sup><br>SNO <sup>51, 65</sup>         |
| P50580 | Proliferation-associated protein 2G4              | AAHLCAEAALR                        | 9.21E-006 | 137.95 | 149                              |   | + |                                                    |
| Q9R0Q7 | Prostaglandin E synthase 3                        | LTFSCLGGSDFNK                      | 2.68E-022 | 232.6  | 402                              |   | + | SSG <sup>43</sup><br>SNO <sup>65</sup>             |
| Q9R1P4 | Proteasome subunit alpha type-1                   | LLCNFMR                            | 5.43E-003 | 103.29 | 85                               |   | + | SSG <sup>43</sup>                                  |
| Q9CQ89 | Protein CutA                                      | LAACVNLIPIQTSIYEWK                 | 6.06E-003 | 86.367 | 94                               | + |   |                                                    |
| P27773 | Protein disulfide-isomerase A3                    | FIQDSIFGLCPHMTEDNKDLIQGK           | 5.48E-012 | 177.73 | 244                              |   | + | SNO <sup>69</sup><br>SSG <sup>43</sup>             |
| E9PZD9 | Protein E330020D12Rik                             | AQGQRPCGFR                         | 3.42E-002 | 45.161 | 49                               | + |   |                                                    |
| E9Q817 | Protein Nfx11                                     | KCCPGNCPPCDQNCGR                   | 4.25E-002 | 26.292 | 492/493/<br>497/500 <sup>h</sup> |   | + |                                                    |
| P52480 | Pyruvate kinase isozymes M1/M2                    | AEGSDVANAVLDGADCIMLSGETAKGDYPLEAVR | 2.65E-027 | 219.26 | 358                              | + |   | SSG <sup>43</sup>                                  |
| P63001 | Ras-related C3 botulinum toxin substrate 1        | HHCPNTPHILVGTK                     | 1.15E-002 | 74.475 | 105                              |   | + | SNO <sup>51</sup>                                  |
| Q91VI7 | Ribonuclease inhibitor                            | SLLELQMSSNPLGDEGVQELCK             | 2.17E-036 | 276.68 | 357                              | + |   |                                                    |
| Q5XJF6 | Ribosomal protein                                 | FSVCVLGDQQHCDEAK                   | 1.34E-011 | 203.7  | 74 <sup>g</sup>                  |   | + |                                                    |
| P47962 | 60S ribosomal protein L5                          | IEGDMIVCAAYAHLPK                   | 2.05E-004 | 119.65 | 76                               |   | + | SSG <sup>43</sup>                                  |
| P62918 | 60S ribosomal protein L8                          | AQLNIGNVLPVGTMPGIVCCLEEKPGDR       | 6.11E-005 | 107.17 | 114/115 <sup>h</sup>             | + |   |                                                    |
| P35979 | 60S ribosomal protein L12                         | EILGTAQSVGCNVDGR                   | 5.11E-031 | 261.64 | 141                              |   | + | SSG <sup>43</sup>                                  |

|        |                                                     |                                      |           |        |                  |  |   |                                                |
|--------|-----------------------------------------------------|--------------------------------------|-----------|--------|------------------|--|---|------------------------------------------------|
| P62830 | 60S ribosomal protein L23                           | ECADLWPR                             | 7.07E-003 | 72.485 | 125              |  | + | SSG <sup>43</sup>                              |
| P14115 | 60S ribosomal protein L27a                          | NQSFCTVNLDK                          | 1.65E-022 | 232.5  | 70               |  | + |                                                |
| P83882 | 60S ribosomal protein L36a                          | LECVEPNCR                            | 8.84E-005 | 134.26 | 72 <sup>g</sup>  |  | + |                                                |
| Q9R0P3 | S-formylglutathione hydrolase                       | CPALYWLSGLTCTEQNFISK                 | 2.26E-003 | 99.891 | 56 <sup>h</sup>  |  | + |                                                |
| O55143 | Sarcoplasmic/endoplasmic reticulum calcium ATPase 2 | CHQYDGLVELATICALCNDLSALDYNEAK        | 3.75E-002 | 36.142 | 417 <sup>g</sup> |  | + |                                                |
| Q9CZ7  | Serine hydroxymethyltransferase                     | YYGGAEVVDEIELLCQR                    | 3.05E-004 | 115.68 | 119              |  | + |                                                |
| Q6PDM2 | Serine/arginine-rich splicing factor 1              | EAGDVCYADVYR                         | 1.07E-006 | 172.13 | 148              |  | + |                                                |
| P80316 | T-complex protein 1 subunit epsilon                 | ETGANLAICQWGFDEANHLLQLQGLPAVR        | 7.28E-008 | 135.54 | 302              |  | + |                                                |
| P80318 | T-complex protein 1 subunit gamma                   | IPGGIIEDSCVLR                        | 2.17E-010 | 200.93 | 213              |  | + | SSG <sup>43</sup><br>SNO <sup>51, 69</sup>     |
|        |                                                     | TLIQNCGASTIR                         | 7.10E-144 | 265.22 | 455              |  | + | SSG <sup>43</sup><br>SNO <sup>51</sup>         |
| Q9R233 | Tapasin                                             | VSLTPAPVVWAAPGEAPPELLCLASHFFPAEGLEVK | 5.96E-010 | 138.41 | 318              |  | + |                                                |
| Q921F2 | TAR DNA-binding protein 43                          | VTEDENDEPIEIPSEDDGTVLLSTVTAQFPACGLR  | 1.47E-002 | 63.203 | 39               |  | + |                                                |
| Q91WM3 | U3 small nucleolar RNA-interacting protein 2        | QLDPLCDIPLVGFINSLK                   | 3.83E-009 | 173.98 | 416              |  | + |                                                |
| P62814 | V-type proton ATPase subunit B, brain isoform       | SDFEENGSMDNVCLFLNLANPTIER            | 5.28E-003 | 71.428 | 258              |  | + |                                                |
| P20152 | Vimentin                                            | QVQSLTCEVDALK                        | 1.95E-005 | 158.58 | 328              |  | + | SSG <sup>43</sup><br>SNO <sup>51, 66, 70</sup> |

<sup>a</sup> UniProtKB protein identifier.

<sup>b</sup> Sequence of peptides identified by shotgun proteomics as containing cysteinyl residues specifically sensible to the A $\beta$ <sub>25-35</sub> treatment in BV2 cells.

<sup>c</sup> Peptide Posterior Error Probability (PEP) score, calculated by MaxQuant algorithms; the smaller the PEP, the more certain is the identification of a peptide.

<sup>d</sup> Andromeda score for the best associated MS/MS spectrum allowing identification in the shotgun proteomics analysis.

<sup>e</sup> Specific cysteinyl residue proved to lose (+, in the resting cell column) or to gain (+, in the activated cell column) the RRM upon beta amyloid treatment.

<sup>f</sup> Literature references on post-translational modifications annotated up to now for each of specific cysteinyl residues proved in our work carrying RRM. SS, disulphide bridge; SSG, Mixed disulphide bridge with glutathione; SNO, nitrosothiols. Numbers refer to those in the Reference section of the manuscript.

<sup>g</sup> Indicates certain identification of the RRM site due to the presence in MS/MS spectra of discriminating ions.

<sup>h</sup> Indicates ambiguous RRM sites due to lack of discriminating ions.
