# Supplementary figures and images for: Reversible redox modifications in the microglial proteome challenged by beta amyloid
Source: Royal Society of Chemistry journal article supplement (doi:10.1039/c4mb00703d), 2015-03-02

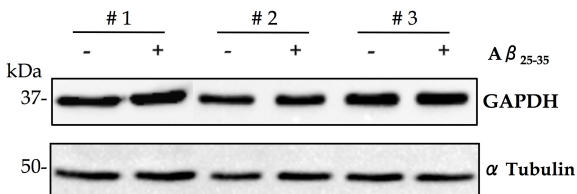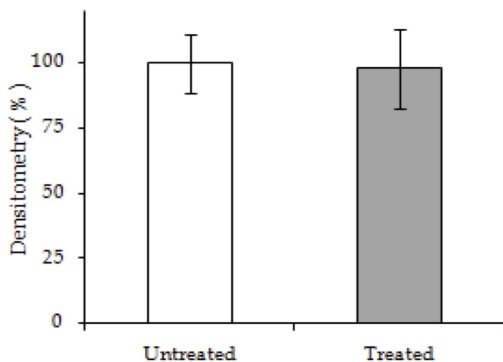

Supplement: c4mb00703d1.pdf [file c4mb00703d1.pdf]
